# Supplementary material for: Taxonomy and Phylogenetic Research on <em>Ralstonia solanacearum</em>: A Complex Pathogen with Extraordinary Economic Consequences
Source: Preprints.org preprint supplement (doi:10.20944/preprints202009.0182.v1), 2020-09-08
Supplement: Supplementary file 3 [file supplementary]

**Table S1.** Ralstonia solanacearum species complex strains used in different analyses.

| **Number** | **Strain Name** | **Geographical Location** | **Host** |
| --- | --- | --- | --- |
| **Phylotype I** | | | |
| 1 | YC45 | China | *Zingiber officinale* (Ginger) |
| 3 | UW 757 | Guatemala | *Osteospermum ecklonis* (African Daisy) |
| 8 | UTT25 | India | *Solanum lycopersicum* (Tomato) |
| 11 | T523 | Philippines | *Solanum lycopersicum* (Tomato) |
| 13 | SL2729 | Korea | *Solanum tuberosum* (Potato) |
| 15 | SEPPX05 | China | *Sesamum indicum* (Sesame) |
| 16 | SD54 | China | *Zingiber officinale* (Ginger) |
| 17 | RSCM | China | *Cucurbita maxima* (Squash) |
| 18 | Rs-10-244 | India | *Capsicum frutescens* (Chili) |
| 19 | RD15 | Taiwan | *Raphanus sativus* (Radish) |
| 25 | P781 | USA | *Mandevilla boliviensis* (Mandevilla) |
| 27 | OE1-1 | Japan | *Solanum melongena* (Eggplant) |
| 29 | KACC10709 | Korea | *Solanum tubersoum* (Potato) |
| 33 | HA4-1 | China | *Arachis hypogaea* (Peanut) |
| 34 | GMI1000 | French Guyana | *Solanum lycopersicum* (Tomato) |
| 37 | FQY_4 | China | Soil |
| 38 | EP1 | China | *Solanum melongena* (Eggplant) |
| 39 | CQPS-1 | China | *Nicotiana tabacum* (Tobacco) |
| 40 | CaRsMep | India | *Elettaria cardamomum* (Small Cardamom) |
| **Phylotype II A** | | |  |
| 7 | UW25/K60 | USA | *Solanum lycopersicum* (Tomato) |
| 9 | UA1612 | Colombia | *Musa spp.* (Banana) |
| 24 | P822 | Florida | *Vaccinium spp.* (Blueberry) |
| 31 | IBSBF2570 | Brazil | *Musa spp.* (Banana) |
| **Phylotype II B** | | |  |
| 2 | UY031 | Uruguay | *Solanum tubersoum* (Potato) |
| 4 | UW551 | Kenya | *Pelargonium spp.* (Geranium) |
| 6 | UW163 | Peru | *Musa paradisiaca* (Plantain) |
| 10 | UA1579 | Colombia | *Musa spp.* (Banana) |
| 23 | Po82 | Mexico | *Solanum tuberosum* (Potato) |
| 26 | P673 | USA | *Epipremnum aureum* (Pothos) |
| 28 | NCPPB909 | Egypt | *Solanum tuberosum* (Potato) |
| 30 | IPO1609 | Netherlands | *Solanum tuberosum* (Potato) |
| 32 | IBSBF1503 | Brazil | *Cucumis sativus* (Cucumber) |
| 35 | Geo_99 | Georgia | *Capsicum annum* (Pepper) |
| 36 | Geo_57 | Georgia | *Solanum tuberosum* (Potato) |
| 41 | CFIA906 | India | *Solanum tuberosum* (Potato) |
| 42 | CFBP6783 | Martinique | *Heliconia caribea* (Heliconia) |
| 43 | CFBP1416 | Costa Rica | *Musa paradisiaca* (Plantain) |
| **Phylotype III** | | |  |
| 5 | UW386 | Nigeria | Soil |
| 40 | CMR15 | Cameroon | *Solanum lycopersicum* (Tomato) |
| **Phylotype IV** | | |  |
| 12 | SL3175 | Korea | *Solanum tuberosum* (Potato) |
| 14 | SL2064 | Korea | *Solanum tuberosum* (Potato) |
| 20 | R229 | Indonesia | *Musa spp.* (Banana) |
| 21 | R24 | Indonesia | *Syzygium aromaticum* (Clove) |
| 22 | PSI07 | Indonesia | *Solanum lycopersicum* (Tomato) |
| 45 | A2HRMardi | Malaysia | *Musa spp.* (Banana) |
